# Supplementary material for: Hypoglycemic Effect of an Herbal Decoction (Modified Gangsimtang) in a Patient with Severe Type 2 Diabetes Mellitus Refusing Oral Anti-Diabetic Medication: A Case Report
Source: MDPI journal article supplement (doi:10.3390/medicina59111919), 2023-10-30
Supplement: s1 [file s1]

**Table S1.** Prescription of modified Gangsimtang.

| Herbal name (in Chinese characters) | Herbal name in Latin          | Scientific name of the origin plant                     | Starting amount (g) per day at Day 4 | Changed amount (g) per day at Day 9 |
|-------------------------------------|-------------------------------|---------------------------------------------------------|--------------------------------------|-------------------------------------|
| Tianhuafen (天花粉)                    | Trichosanthis Radix           | <i>Trichosanthes kirilowii</i> Maximowicz               | 16                                   | 24                                  |
| Maimendong (麥門冬)                    | Liriope Platyphylla           | <i>Liriope platyphylla</i> Wang et Tang                 | 12                                   | 12                                  |
| RenCan (人參)                         | Ginseng Radix                 | <i>Panax ginseng</i> C. A. Meyer                        | 12                                   | 12                                  |
| Yuanzhi (遠志)                        | Polygalae Radix               | <i>Polygala tenuifolia</i> Willdenow                    | 8                                    | 8                                   |
| Danggui (當歸)                        | Angelicae Gigantis Radix      | <i>Angelica gigas</i> Nakai                             | 8                                    | 8                                   |
| Shudihuang (熟地黃)                    | Rehmanniae Radix Preparata    | <i>Rehmannia glutinosa</i> Liboschitz ex Steudel        | 8                                    | 8                                   |
| Fuling(茯苓)                          | Poria Sclerotium              | <i>Poria cocos</i> Wolf                                 | 8                                    | 8                                   |
| Wuweizi(五味子)                        | Schisandrae Fructus           | <i>Schisandra chinensis</i> Baillon                     | 8                                    | 8                                   |
| Gancao(甘草)                          | Glycyrrhizae Radix et Rhizoma | <i>Glycyrrhiza uralensis</i> Fischer                    | 8                                    | 8                                   |
| Huangqi(黃芪)                         | Astragali Radix               | <i>Astragalus membranaceus</i> Bunge                    | 8                                    | 8                                   |
| Gegen(葛根)                           | Peurariae Radix               | <i>Pueraria lobata</i> Ohwi                             | (-)                                  | 8                                   |
| Dazao(大棗)                           | Zizyphi Fructus               | <i>Zizyphus jujuba</i> Miller var. <i>inermis</i> Rehde | 6                                    | 6                                   |
